# Supplementary material for: Multiple Minor QTLs Are Responsible for Fusarium Head Blight Resistance in Chinese Wheat Landrace Haiyanzhong
Source: PLoS One. 2016 Sep 27;11(9):e0163292. doi: 10.1371/journal.pone.0163292 (PMC5038969; doi:10.1371/journal.pone.0163292)
Supplement: S1 Table — (XLSX) [file pone.0163292.s001.xlsx]

## Sheet: S1 Table
NO.	Accessions	Origin	Region	Pedigree	Class
1	Atlas66		CItr 12561	Frondoso//Redhart 3/Noll 28(sister selection of Atlas 50)	SRW
2	OK04505	OSU	SRPN	OK91724/2*Jagger	HRW
3	KS05HW136-3	KSU-HAYS	SRPN	KS98HW518(93HW91/93HW255)//KS98H245(IKE/TA2460//*3T200)/TREGO	HWW
4	T158	Trio	SRPN	KS93U206/ 2*T81	HRW
5	KS980554-12-~9	KSU-Manhattan	SRPN	2180*K/2163//?/3/W1062A*HVA114/W3416	HRW
6	KS980512-2-2	KSU-Manhattan	SRPN	T67/X84W063-9-45//K92/3/SNF/4/X86509-1-1/X84W063-9-39-2//K92	HWW
7	TX04M410211	Texas A&M	SRPN	MASON/JAGGER//OGALLALA	HRW
8	N98L20040-44	ARS-LNK	NRPN	CS/PI467024//CS/3/SXLD/4/TAM202/5/SXLD	HRW
9	NI04420	UNL	NRPN	NE96644(=ODESSKAYA P./CODY)//PAVON/*3SCOUT66/3/WAHOO SIB	HRW
10	Duster			Duster	HRW
11	OK02522W		Oklahoma State University	OK02522W	HWW
12	Scout 66	check	SRPN	Scout 66	HRW
13	AP04T8211	AgriPro South	SRPN	W98-232/KS96WGRC38	HRW
14	HV9W96-1271R-1	WestBred	SRPN	HV9W00-1551WP/KS94U326	HRW
15	NE04424	UNL	SRPN	KS92H363-2/COUGAR SIB(=NE85707/TBIRD)	HRW
16	CO02W237	CSU	SRPN	98HW519(93HW91/93HW255)/96HW94	HWW
17	OK03825-5403-6	OSU	SRPN	(Custer*3/94M81)=STARS 0601W	HRW
18	TX04V075080	Texas A&M	SRPN	JAGGER/TX93V5722//TX95D8905	HRW
19	SD06165	SDSU	NRPN	Wesley/SD97049	HRW
20	NX03Y2489	ARS-LNK	NRPN	BaiHuo/Kanto107//Ike/3/KS91H184/3*RBL//N87V106	HWW
21	NI04427	UNL	NRPN	KS98HW22//W95-615W/N94L189	HRW
22	Endurance			Endurance	HRW
23	TAM-107	check	SRPN	TAM-107	HRW
24	AP05T2413	AgriPro South	SRPN	(KS95U522/TX95VA0011)F1/Jagger	HRW
25	HV9W03-539R	WestBred	SRPN	KS94U275/1878//JAGGER	HRW
26	CO03064	CSU	SRPN	CO970547/Prowers 99	HRW
27	TX02A0252	Texas A&M	SRPN	TX90V6313//TX94V3724(TAM-200 BC41254-1-8-1-1/TX86V1405	HRW
28	Kharkof	check	NRPN	Kharkof	HRW
29	SD06173	SDSU	NRPN	BULK02R2B	HRW
30	NX04Y2107	ARS-LNK	NRPN	NW98S081/99Y1442	HRW
31	NE05548	UNL	NRPN	NE97426 (=BRIGANTINA.2*ARAPAHOE)/NE98574 (=CO850267/RAWHIDE)	HRW
32	Deliver		Oklahoma State University	Deliver	HRW
33	Trego	check	SRPN	Trego	HWW
34	HV9W03-696R-1	WestBred	SRPN	N94L027/TBOLT//KS89180B	HRW
35	NE05426	UNL	SRPN	W95-091 (=KS85-663-8-9//WI81-133/THUNDERBIRD)/AKRON	HRW
36	CO03W054	CSU	SRPN	KS96HW94//Trego/CO960293	HWW
37	TX03A0148	Texas A&M	SRPN	TX89A7137/TIPACNA	HRW
38	Antelope	check	NRPN	Antelope	HWW
39	SD03164-1	SDSU	NRPN	89118RC1-X-9-3-3/TX96D2845//Expedition	HRW
40	NW04Y2188	ARS-LNK	NRPN	MO8/REDLAND//KS91H184/3*RIO BLANCO	HRW
41	NE05549	UNL	NRPN	NI98414 (=NE90614/NE87612//NE87612)/WESLEY	HRW
42	OK Bullet			OK Bullet	HRW
43	OK03716W		Oklahoma State University	Oro Blanco/OK92403 F4:11	HRW
44	OK00514-05806	OSU	SRPN	KS96WGRC39/Jagger	HRW
45	AP06T3832	AgriPro South	SRPN	HBK0935-29-15/KS90W077-2-2/VBF0589-1	HRW
46	HV9W02-942R	WestBred	SRPN	53/3/ABL/1113//K92/4/JAG/5/KS89180B	HRW
47	NE05430	UNL	SRPN	IN92823A1-1-4-5/NE92458	HRW
48	CO03W139	CSU	SRPN	CO980862/Lakin	HWW
49	TX03A0563	Texas A&M	SRPN	X96V107/OGALLALA	HRW
50	Wesley	check	NRPN	Wesley	HRW
51	NE02533	UNL	NRPN	NE94458 (=GK-SAGVARI/COLT//NE86582)/JAGGER	HRW
52	NE05569	UNL	NRPN	Wesley//Pronghorn/Arlin	HRW
53	Overley			Overley	HRW
54	OK05903C		Oklahoma State University	TXGH12588-120*4/FS4//2174/3/Jagger F4:10 RC	HWW
55	Century		PI 502912	Payne//TAM W-101/Amigo	HRW
56	KS05HW15-2	KSU-HAYS	SRPN	KS98HW452(KS91H153/KS93HW255)/CO960293//KS920709B-5-2(T67/X84W063-9-45//K92)	HWW
57	T151	Trio	SRPN	T81/ KS93U206	HRW
58	KS970093-8-9-#1	KSU-Manhattan	SRPN	HBK1064-3/KS84063-9-39-3-4W//X960103	HRW
59	CO03W239	CSU	SRPN	KS01-5539/CO99W165	HWW
60	TX04A001246	Texas A&M	SRPN	TX95V4339/TX94VT938-6	HRW
61	Jerry	check	NRPN	Jerry	HRW
62	SD05118	SDSU	NRPN	Wesley/NE93613	HRW
63	NE02558	UNL	NRPN	JAGGER/ALLIANCE	HRW
64	MT0495	MT	NRPN	MT9640/NB1133	HRW
65	Fuller			Fuller	HRW
66	OK03522	OSU	SRPN	N566/OK94P597	HRW
67	KS05HW121-2	KSU-HAYS	SRPN	KS99-5-16(94HW98/91H153)//STANTON/KS98HW423(JAG/93HW242)	HWW
68	T153	Trio	SRPN	T136/ T151	HRW
69	KS970187-1-10	KSU-Manhattan	SRPN	TAM107*2/TA759//HBC197F-1/3/2145	HRW
70	CO03W043	CSU	SRPN	KS96HW94/CO980352	HWW
71	TX01V5134RC-3	Texas A&M	SRPN	TAM-200/JAGGER	HRW
72	SD06W117	SDSU	NRPN	Alice/SD00W024	HWW
73	SD05210	SDSU	NRPN	SD98444/SD97060	HRW
74	NW03666	UNL	NRPN	N94S097KS/NE93459	HRW
75	MTS0531	MT	NRPN	L'Govskaya 167/Rampart//MT9409 (solid stem)	HWW
76	Centerfield		Oklahoma State University	Centerfield	HRW
77	OK04525		Oklahoma State University	FFR525W/Hickok//Coronado F4:11	HRW
78	OK03305	OSU	SRPN	N40/OK94P455	HRW
79	MT0552	MT	NRPN	N95L159/CDC Clair	HRW
80	T154	Trio	SRPN	T88/2180//T811	HRW
81	NE05496	UNL	SRPN	KS95HW62-6 (=KS87H325/RIO BLANCO)/HALLAM	HRW
82	TX04M410164	Texas A&M	SRPN	MIT/TX93V5722//W95-301	HRW
83	SD06069	SDSU	NRPN	Harry/Wesley//Jerry	HRW
84	SD05W030	SDSU	NRPN	SD98W302/NW97S186	HWW
85	chisholm			chisholm	HRW
86	Guymon		Oklahoma State University	Guymon	HWW
87	OK05830		Oklahoma State University	OK93617/Jagger F6:12	HRW
88	OK02405	OSU	RGON	Tonkawa/GK50	HRW
89	KS010957K~4	KSU-Manhattan	RGON	2145/Karl 92//KS940786-6-11	HRW
90	NE06619	UNL	RGON	WESLEY/WAHOO	HRW
91	MTS04120	MT	RGON	L'Govskaya 167/Rampart	HRW
92	TX06A001239	Texas A&M	RGON	OGALLALA/KS94U275	HRW
93	TXHT006F8-CS06/472-STA34	TAMU/CS	RGON	Lockett/Halberd	HRW
94	MO011126	McKendry	UESRWWN	MO94-103/Pio2552	SRW
95	OH02-7217	Sneller	UESRWWN	92118B4-2/OH561	SRW
96	MD99W483-06-9	Costa	UESRWWN	VA97W358/Renwood 3260	SRW
