# Supplementary material for: Multiple Minor QTLs Are Responsible for Fusarium Head Blight Resistance in Chinese Wheat Landrace Haiyanzhong
Source: PLoS One. 2016 Sep 27;11(9):e0163292. doi: 10.1371/journal.pone.0163292 (PMC5038969; doi:10.1371/journal.pone.0163292)
Supplement: S2 Table — (XLSX) [file pone.0163292.s002.xlsx]

## Sheet: Sheet1
List of KASP assays developed from GBS-SNP sequences
Primer name	Chrom	Primer sequence (5’-3’)
GBS3127_H	5A	GAAGGTGACCAAGTTCATGCTTACCCGCATTCCAGTCTCTt
GBS3127_W	5A	GAAGGTCGGAGTCAACGGATTTACCCGCATTCCAGTCTCTc
GBS3127_R	5A	TCCCTAGCTGCGACCTTTCC
GBS5669_H	5A	GAAGGTGACCAAGTTCATGCTCAGTGCCAATCTGTTCGCAa
GBS5669_W	5A	GAAGGTCGGAGTCAACGGATTCAGTGCCAATCTGTTCGCAg
GBS5669_R	5A	GGTGTGATCGCACGGGACTC
GBS2573_H	5A	GAAGGTGACCAAGTTCATGCTCAGCGAGCAGGCACAGTAAAAc
GBS2573_W	5A	GAAGGTCGGAGTCAACGGATTCAGCGAGCAGGCACAGTAAAAt
GBS2573_R	5A	TGGCTAGAAACGCTCGCAGA
GBS1852_H	5A	GAAGGTGACCAAGTTCATGCTCAGCAGTTTCACCAACATTAATCATACt
GBS1852_W	5A	GAAGGTCGGAGTCAACGGATTCAGCAGTTTCACCAACATTAATCATACa
GBS1852_R	5A	TGGTCTTTGATGTAGTGTTCGACATTT
GBS0158_H	6B	GAAGGTGACCAAGTTCATGCTGCCTCAGCCCCCCTTGAt
GBS0158_W	6B	GAAGGTCGGAGTCAACGGATTGCCTCAGCCCCCCTTGAc
GBS0158_R	6B	CGTGGGTTTGGGGATCTAGG
GBS4963_H	6B	GAAGGTGACCAAGTTCATGCTGAATCCTATTTGACACTGCAGGTGTt
GBS4963_W	6B	GAAGGTCGGAGTCAACGGATTGAATCCTATTTGACACTGCAGGTGTc
GBS4963_R	6B	GACAGCGCCCGTTAGCAAAA
GBS4305_H	6B	GAAGGTGACCAAGTTCATGCTCCCGTTAGCAAAATGCCCTATAAt
GBS4305_W	6B	GAAGGTCGGAGTCAACGGATTCCCGTTAGCAAAATGCCCTATAAc
GBS4305_R	6B	ACGTTTAAGGCGCCGAACAT
GBS4116_H	6B	GAAGGTGACCAAGTTCATGCTGCCGATTGACAGCGCg
GBS4116_W	6B	GAAGGTCGGAGTCAACGGATTGCCGATTGACAGCGCt
GBS4116_R	6B	TAGTGACATGGCCCGCGTAG
GBS5855_H	2B-2	GAAGGTGACCAAGTTCATGCTGCCCCTAAATGTGAAGAACTGGTCg
GBS5855_W	2B-2	GAAGGTCGGAGTCAACGGATTGCCCCTAAATGTGAAGAACTGGTCa
GBS5855_R	2B-2	AAAACGGCCGCTCTCTCTCC
GBS1713_H	2B-2	GAAGGTGACCAAGTTCATGCTGTTGGGGCTATCAAATTTTTCg
GBS1713_W	2B-2	GAAGGTCGGAGTCAACGGATTGTTGGGGCTATCAAATTTTTCa
GBS1713_R	2B-2	GACGGGGTTGGAATGAA
Note: H forward primer with ‘HYZ’ allele, W forward primer with ‘Wheaton’ allele, R reverse primer
